# Supplementary material for: Validation of Residual Cancer Burden as Prognostic Factor for Breast Cancer Patients After Neoadjuvant Therapy
Source: Springer Nature journal article supplement (doi:10.1245/s10434-019-07741-w), 2019-08-26
Supplement: MOESM2 [file 17103378]

## Supporting Figure 2

Overall survival (OS) experience of the total study cohort (n=184).

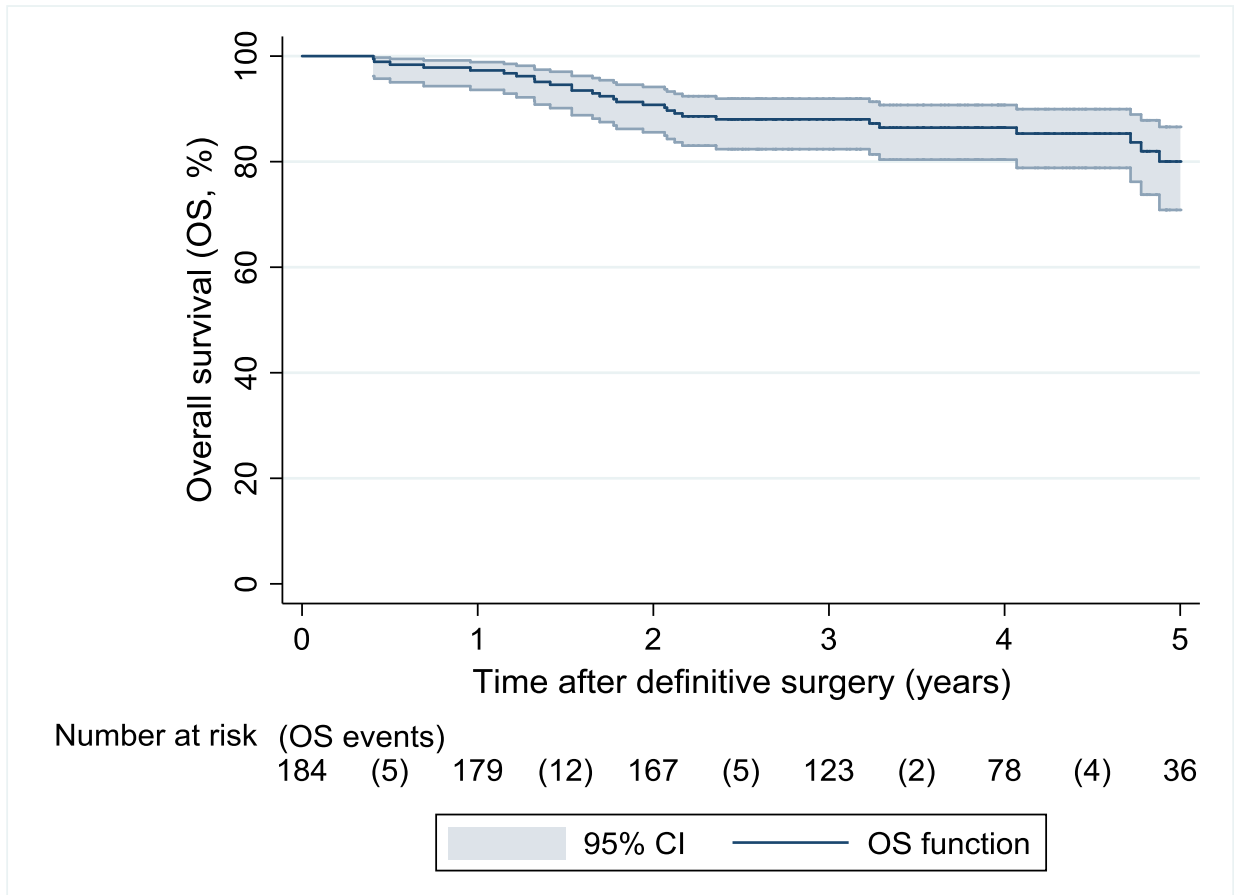

OS was estimated with a Kaplan-Meier estimator. The 95% confidence band is represented by the grey-shaded area. Numbers below the plot represent a risk table, with the number of OS events occurring within the respective interval report in round brackets.
