# Supplementary material for: Validation of Residual Cancer Burden as Prognostic Factor for Breast Cancer Patients After Neoadjuvant Therapy
Source: Springer Nature journal article supplement (doi:10.1245/s10434-019-07741-w), 2019-08-26
Supplement: MOESM3 [file 17103378]

### Supporting Figure 3

**Kaplan-Meier Overall survival (OS) functions by RCB class.**

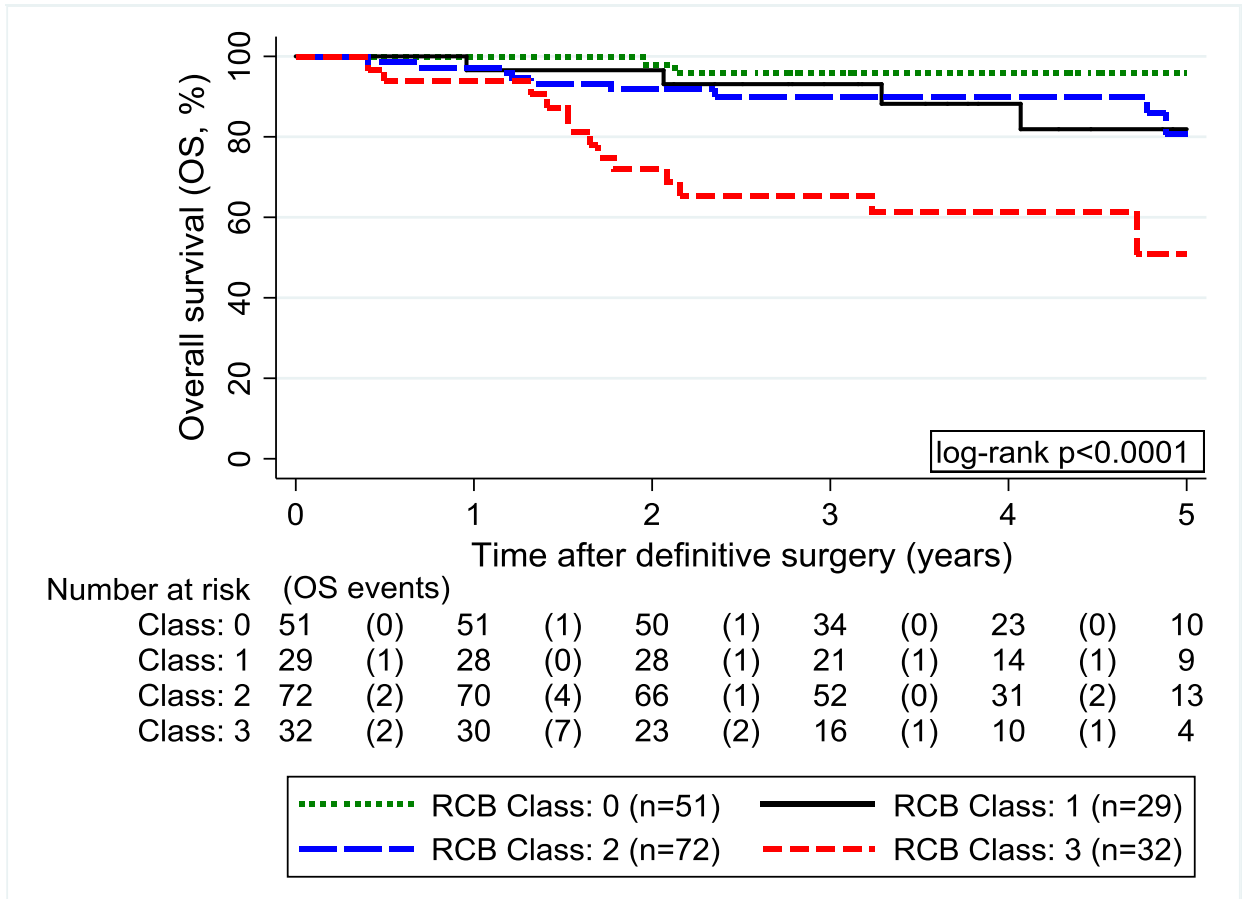

Numbers below the Kaplan-Meier plot represent a risk table per RCB class, with the number of OSS events occurring within the respective interval report in round brackets.
