# Supplementary material for: Validation of Residual Cancer Burden as Prognostic Factor for Breast Cancer Patients After Neoadjuvant Therapy
Source: Springer Nature journal article supplement (doi:10.1245/s10434-019-07741-w), 2019-08-26
Supplement: MOESM4 [file 17103378]

## Supporting Table 1

### Outcomes by intrinsic subtype

| Breast cancer subtype          |  | pCR rate<br>(%, 95%CI) | 5-year RFS<br>(%, 95%CI) | 5-year OS<br>(%, 95%CI) |
|--------------------------------|--|------------------------|--------------------------|-------------------------|
|                                |  |                        |                          |                         |
| ER/PR+ or -/HER2-              |  | 7% (2-15)              | 67% (52-78)              | 77% (60-87)             |
| HER2+ (classical and variants) |  | 49% (36-62)            | 79% (65-87)              | 88% (75-94)             |
| Triple-negative                |  | 33% (20-48)            | 78% (63-88)              | 79% (61-89)             |

Abbreviations: 95%CI – 95% confidence interval, ER – estrogen receptor, OS – overall survival, RFS – recurrence-free survival, pCR – pathologic complete remission, PR – progesterone receptor, | - or, HER-2 – human epidermal growth factor receptor 2 (erb-B2).
