# Supplementary material for: Validation of Residual Cancer Burden as Prognostic Factor for Breast Cancer Patients After Neoadjuvant Therapy
Source: Springer Nature journal article supplement (doi:10.1245/s10434-019-07741-w), 2019-08-26
Supplement: MOESM5 [file 17103378]

## Supporting Table 2

### A multiple linear regression model investigating predictors of the RCB score (n=184).

The regression coefficient  $\beta$  interpreted as follows: “For one unit increase in the variable, the RCB score changes on average by  $\beta$ .” The unit of  $\beta$  is the RCB score.

| Variable                                                                                                | Regression coefficient $\beta$ | 95%CI         | p                 |
|---------------------------------------------------------------------------------------------------------|--------------------------------|---------------|-------------------|
| Age at entry (per 5 years increase)                                                                     | 0.06                           | -0.05-0.18    | 0.278             |
| Molecular breast cancer subtype                                                                         | /                              | /             | /                 |
| ---ER+/PR+ or -/ HER2-                                                                                  | Ref.                           | Ref.          | Ref.              |
| ---HER2+ (classical and variants)                                                                       | -1.09                          | -1.50-(-0.67) | <b>&lt;0.0001</b> |
| ---Triple-negative                                                                                      | -0.56                          | -1.05-(-0.08) | <b>0.024</b>      |
| Tumor grade G3                                                                                          | 0.11                           | -0.32-0.54    | 0.611             |
| Ki-67 labeling index (per 10% increase)                                                                 | -0.15                          | -0.23-(-0.07) | <b>&lt;0.0001</b> |
| Postmenopausal status                                                                                   | 0.07                           | -0.44-0.59    | 0.785             |
| Neoadjuvant systemic therapy – Other regimens than sequential anthracycline + taxane ( $\pm$ anti-Her2) | 0.55                           | -0.10-1.20    | 0.094             |

Abbreviations: 95%CI – 95% confidence interval, ER – estrogen receptor, PR – progesterone receptor, | - or, HER-2 – human epidermal growth factor receptor 2 (erb-B2).
