# Supplementary material for: Validation of Residual Cancer Burden as Prognostic Factor for Breast Cancer Patients After Neoadjuvant Therapy
Source: Springer Nature journal article supplement (doi:10.1245/s10434-019-07741-w), 2019-08-26
Supplement: MOESM6 [file 17103378]

### Supporting Table 3

#### Subgroup analysis: Interactions of RCB with clinically-relevant subgroups.

Note that due to the relatively small number of patients within some selected subgroups, results have to be considered hypothesis-generating. \*Other regimens include mostly patients who received only anthracyclines or only taxanes, mainly related to toxicity.

| Variable                   | Subgroups                                                           | HR    | 95%CI       | Interaction p-value |
|----------------------------|---------------------------------------------------------------------|-------|-------------|---------------------|
| Age                        | Age ≤ 65 years                                                      | 1.54  | 1.21-1.97   | 0.005               |
|                            | Age > 65 years                                                      | 4.50  | 2.06-9.83   |                     |
| Molecular subtype          | ER+PR+ or ER+ PR+ but HER2-                                         | 1.75  | 1.21-2.53   | 0.333               |
|                            | HER2+ (classical and variants)                                      | 1.82  | 1.24-2.68   |                     |
|                            | Triple-negative                                                     | 2.46  | 1.46-4.14   |                     |
| Tumor grade                | G1-G2                                                               | 1.57  | 0.95-2.58   | 0.588               |
|                            | G3                                                                  | 1.86  | 1.47-2.36   |                     |
| Ki-67 labeling index       | > 25%                                                               | 2.22  | 1.71-2.89   | 0.021               |
|                            | ≤ 25%                                                               | 1.24  | 0.81-1.92   |                     |
| Menopausal status          | Pre-/perimenopausal status                                          | 1.04  | 0.68-1.59   | 0.004               |
|                            | Postmenopausal status                                               | 2.20  | 1.66-2.93   |                     |
| Type of systemic treatment | Other regimens than sequential anthracycline + taxane (±anti-HER2)* | 11.98 | 0.93-153.93 | 0.043               |
|                            | Sequential anthracycline + taxane (±anti-HER2)*                     | 1.63  | 1.28-2.06   |                     |
| Type of surgery            | Breast conserving therapy                                           | 1.53  | 1.13-2.09   | 0.211               |
|                            | Mastectomy                                                          | 2.05  | 1.44-2.91   |                     |

Abbreviations: RCB – residual cancer burden, HR – hazard ratio, 95%CI – 95% confidence interval, ER – estrogen receptor, PR – progesterone receptor, | - or, HER-2 – human epidermal growth factor receptor 2 (erb-B2).
