# Supplementary material for: Validation of Residual Cancer Burden as Prognostic Factor for Breast Cancer Patients After Neoadjuvant Therapy
Source: Springer Nature journal article supplement (doi:10.1245/s10434-019-07741-w), 2019-08-26
Supplement: MOESM7 [file 17103378]

## Supporting Table 4

### Analysis of Overall survival (OS) Univariable Cox models (n=184).

| Variable                                                                                           | HR    | 95%CI      | p               |
|----------------------------------------------------------------------------------------------------|-------|------------|-----------------|
| RCB score (by 1 point increase)                                                                    | 1.96  | 1.49-2.59  | < <b>0.0001</b> |
| RCB class                                                                                          | /     | /          | /               |
| ---0                                                                                               | Ref.  | Ref.       | Ref.            |
| ---1                                                                                               | 3.39  | 0.62-18.50 | 0.159           |
| ---2                                                                                               | 3.27  | 0.71-15.15 | 0.129           |
| ---3                                                                                               | 12.89 | 2.91-57.16 | <b>0.001</b>    |
| Age at entry (per 5 years increase)                                                                | 1.13  | 0.96-1.34  | 0.135           |
| Molecular breast cancer subtype                                                                    | /     | /          | /               |
| ---ER+/PR+ or -/ HER2-                                                                             | Ref.  | Ref.       | Ref.            |
| ---HER2+ (classical and variants)                                                                  | 0.75  | 0.30-1.91  | 0.548           |
| ---Triple-negative                                                                                 | 1.27  | 0.53-3.01  | 0.592           |
| Tumor grade G3                                                                                     | 2.01  | 0.81-4.95  | 0.131           |
| Ki-67 labeling index (per 10% increase)                                                            | 1.06  | 0.92-1.21  | 0.416           |
| Postmenopausal status                                                                              | 1.59  | 0.73-3.45  | 0.239           |
| Neoadjuvant systemic therapy – Other regimens than sequential anthracycline + taxane (±anti-Her2)* | 3.10  | 1.25-7.67  | <b>0.014</b>    |
| Breast conservation                                                                                | 0.64  | 0.30-1.34  | 0.234           |
| Axillary lymph node dissection (ALND)                                                              | NE    | NE         | NE              |
| Post-neoadjuvant tumor size (TNM ypT)                                                              | /     | /          | /               |
| ---ypTis-ypT0                                                                                      | Ref.  | Ref.       | Ref.            |
| ---ypT1                                                                                            | 1.77  | 0.56-5.56  | 0.328           |
| ---ypT2                                                                                            | 5.02  | 1.51-16.68 | <b>0.002</b>    |
| ---ypT3-ypT4                                                                                       | 5.39  | 1.44-20.11 | <b>0.012</b>    |
| Number of positive nodes (per 1 increase)                                                          | 1.13  | 1.08-1.19  | < <b>0.0001</b> |
| Post-neoadjuvant nodal status (TNM ypN)                                                            | /     | /          | /               |
| ---ypN0                                                                                            | Ref.  | Ref.       | Ref.            |
| ---ypN1                                                                                            | 1.91  | 0.69-5.30  | 0.216           |
| ---ypN2                                                                                            | 3.35  | 1.10-10.20 | <b>0.033</b>    |
| ---ypN3                                                                                            | 7.56  | 2.71-21.13 | < <b>0.0001</b> |
| Adjuvant endocrine therapy                                                                         | 0.57  | 0.27-1.22  | 0.148           |

Abbreviations: HR – hazard ratio, 95%CI – 95% confidence interval, Ref. – Reference category, ER – estrogen receptor, PR – progesterone receptor, | - or, HER-2 – human epidermal growth factor receptor 2 (erb-B2).
